# Supplementary material for: Characterisations of Europe's integrated water vapour and assessments of atmospheric reanalyses using more than 2 decades of ground-based GPS
Source: Copernicus journal article supplement (doi:10.5194/acp-23-3517-2023), 2023-03-21
Supplement: Supplementary file 1 [file acp-23-3517-2023-supplement.zip]

Archive with 3 entries (3 files):
- acp-23-3517-2023-supplement-title-page.pdf
- acp-2021-797-supplement.pdf
- Table S3_ ACP-2021-797.xlsx
