# Supplementary material for: Characterisations of Europe's integrated water vapour and assessments of atmospheric reanalyses using more than 2 decades of ground-based GPS
Source: Copernicus journal article supplement (doi:10.5194/acp-23-3517-2023), 2023-03-21
Supplement: Supplementary file 1 [file acp-23-3517-2023-supplement.zip › acp-23-3517-2023-supplement-title-page.pdf]

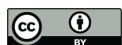

*Supplement of*

## **Characterisations of Europe's integrated water vapour and assessments of atmospheric reanalyses using more than 2 decades of ground-based GPS**

**Peng Yuan et al.**

*Correspondence to:* Peng Yuan ([peng.yuan@kit.edu](mailto:peng.yuan@kit.edu))

- [acp-23-3517-2023-supplement-title-page.pdf](#)
- [Table S3\\_ ACP-2021-797.xlsx](#)
- [acp-2021-797-supplement.pdf](#)

The copyright of individual parts of the supplement might differ from the article licence.
