# Supplementary material for: Characterisations of Europe's integrated water vapour and assessments of atmospheric reanalyses using more than 2 decades of ground-based GPS
Source: Copernicus journal article supplement (doi:10.5194/acp-23-3517-2023), 2023-03-21
Supplement: Supplementary file 1 [file acp-23-3517-2023-supplement.zip › acp-2021-797-supplement.pdf]

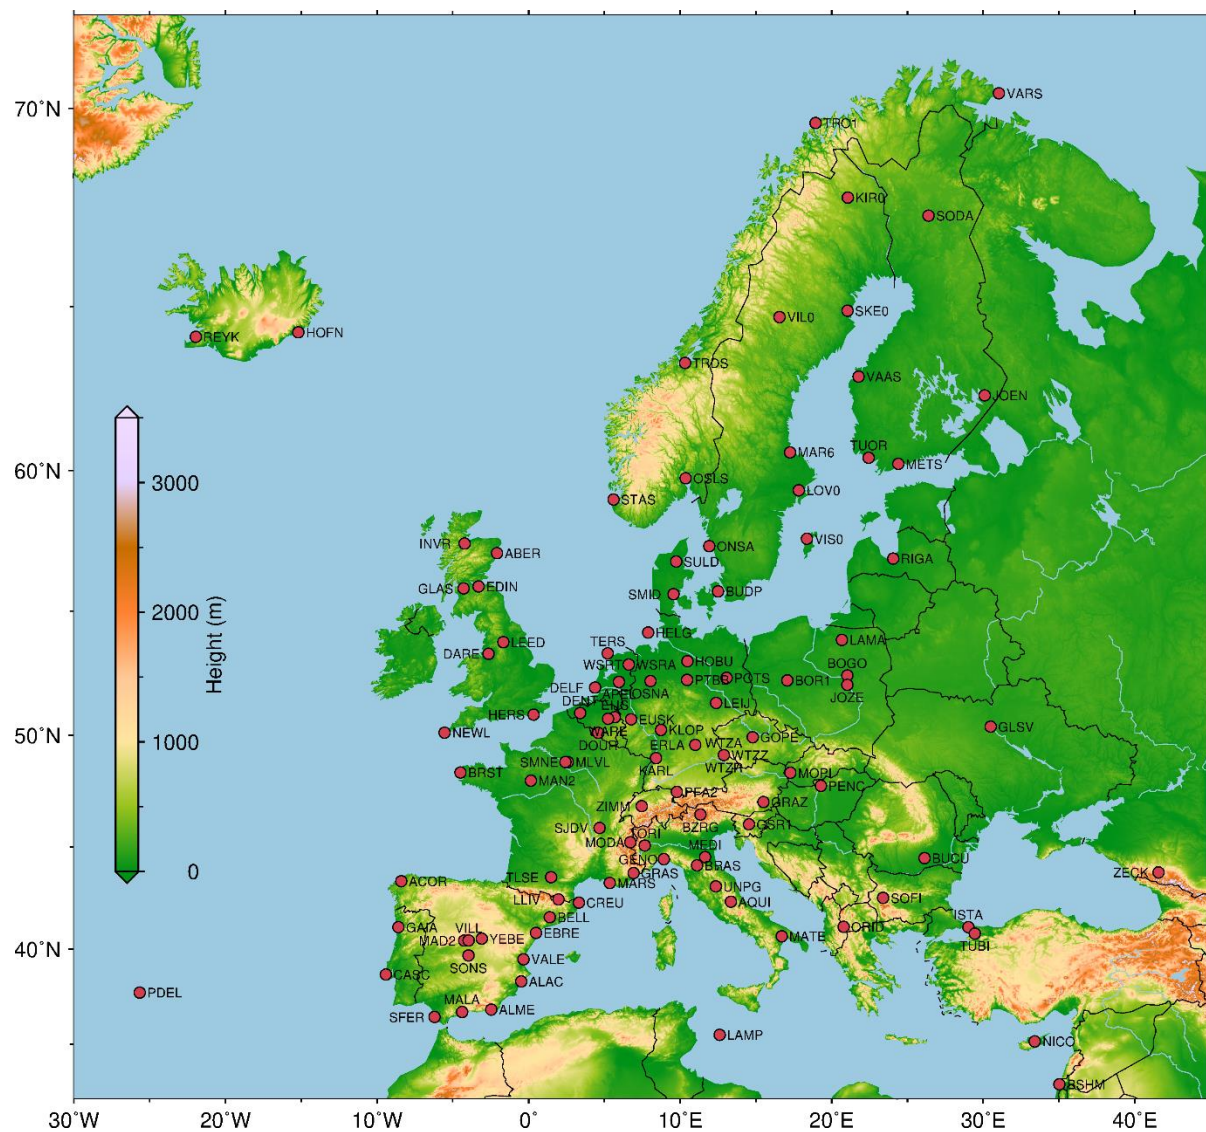

**Figure S1.** Geographical distribution of the 108 GPS stations. This is an amplified version of Fig. 1 with station names labelled.

**Table S1.** Time period, number of years (Num. of Y.), number of daily observations (Num. of O.), and integration rate (I-rate) of the GPS IWV time series. The Alt denotes altitude in orthometric height.

| Station | Lat. (°) | Lon. (°) | Alt. (m) | Begin date | End date   | Num. of Y. | Num. of O. | I-rate (%) |
|---------|----------|----------|----------|------------|------------|------------|------------|------------|
| ABER    | 57.14    | -2.08    | 3.1      | 1998-09-18 | 2018-12-31 | 20.3       | 6415       | 86.6       |
| ACOR    | 43.36    | -8.40    | 11.9     | 2003-11-14 | 2018-12-31 | 15.1       | 5291       | 95.7       |
| ALAC    | 38.34    | -0.48    | 9.9      | 1998-03-07 | 2018-12-31 | 20.8       | 7165       | 94.2       |
| ALME    | 36.85    | -2.46    | 77.1     | 1999-12-04 | 2018-12-31 | 19.1       | 6682       | 95.9       |
| APEL    | 52.21    | 5.96     | 72.4     | 2000-10-24 | 2018-12-31 | 18.2       | 6477       | 97.5       |
| AQUI    | 42.37    | 13.35    | 664.1    | 1999-06-15 | 2018-12-31 | 19.5       | 6710       | 94.0       |
| BELL    | 41.60    | 1.40     | 802.9    | 1998-12-16 | 2018-12-31 | 20.0       | 7118       | 97.2       |
| BOGO    | 52.48    | 21.04    | 118.8    | 1996-07-01 | 2018-12-29 | 22.5       | 7749       | 94.3       |
| BOR1    | 52.28    | 17.07    | 88.8     | 1994-09-28 | 2018-12-31 | 24.3       | 8642       | 97.5       |
| BRAS    | 44.12    | 11.11    | 857.5    | 2000-05-27 | 2018-12-31 | 18.6       | 6545       | 96.3       |
| BRST    | 48.38    | -4.50    | 14.3     | 1998-11-01 | 2018-12-31 | 20.2       | 6506       | 88.3       |
| BSHM    | 32.78    | 35.02    | 204.3    | 1998-09-02 | 2018-12-29 | 20.3       | 6722       | 90.5       |
| BUCU    | 44.46    | 26.13    | 107.7    | 1999-02-09 | 2018-12-31 | 19.9       | 7062       | 97.2       |
| BUDP    | 55.74    | 12.50    | 57.7     | 2001-01-01 | 2018-12-31 | 18.0       | 6406       | 97.4       |
| BZRG    | 46.50    | 11.34    | 279.0    | 2002-07-12 | 2018-12-31 | 16.5       | 5853       | 97.3       |
| CASC    | 38.69    | -9.42    | 22.2     | 1999-09-28 | 2018-12-31 | 19.3       | 6706       | 95.3       |
| CREU    | 42.32    | 3.32     | 83.6     | 2003-07-31 | 2018-12-31 | 15.4       | 5465       | 97.0       |
| DARE    | 53.34    | -2.64    | 36.2     | 2000-07-09 | 2018-12-31 | 18.5       | 6236       | 92.4       |
| DELF    | 51.99    | 4.39     | 30.7     | 1996-08-08 | 2018-12-31 | 22.4       | 8012       | 97.9       |
| DENT    | 50.93    | 3.40     | 19.2     | 1996-01-02 | 2018-12-31 | 23.0       | 8077       | 96.2       |
| DOUR    | 50.09    | 4.60     | 236.4    | 1996-01-02 | 2018-12-31 | 23.0       | 8052       | 95.9       |
| EBRE    | 40.82    | 0.49     | 57.6     | 1997-04-16 | 2018-12-31 | 21.7       | 7588       | 95.7       |
| EDIN    | 55.92    | -3.29    | 65.8     | 2000-04-10 | 2018-12-31 | 18.7       | 6357       | 92.9       |
| EIJS    | 50.76    | 5.68     | 57.6     | 1996-08-30 | 2018-12-31 | 22.3       | 7925       | 97.1       |
| ERLA    | 49.59    | 11.00    | 291.0    | 1997-08-03 | 2018-12-31 | 21.4       | 7484       | 95.7       |
| EUSK    | 50.67    | 6.76     | 198.1    | 1998-04-04 | 2018-12-31 | 20.7       | 7351       | 97.0       |
| GAIA    | 41.11    | -8.59    | 232.1    | 2000-01-02 | 2018-12-31 | 19.0       | 6435       | 92.7       |
| GENO    | 44.42    | 8.92     | 110.0    | 1998-07-23 | 2018-12-31 | 20.4       | 7044       | 94.3       |
| GLAS    | 55.85    | -4.30    | 16.9     | 2000-03-16 | 2018-12-31 | 18.8       | 6467       | 94.2       |
| GLSV    | 50.36    | 30.50    | 200.8    | 1997-12-09 | 2018-12-31 | 21.1       | 7464       | 97.0       |
| GOPE    | 49.91    | 14.79    | 547.6    | 2001-12-22 | 2018-12-31 | 17.0       | 6058       | 97.4       |
| GRAS    | 43.75    | 6.92     | 1268.2   | 1995-02-22 | 2018-12-31 | 23.9       | 8013       | 92.0       |
| GRAZ    | 47.07    | 15.49    | 490.8    | 1994-01-02 | 2018-12-31 | 25.0       | 8678       | 95.0       |
| GSRI    | 46.05    | 14.54    | 304.8    | 2001-12-23 | 2018-12-31 | 17.0       | 5958       | 95.8       |
| HELG    | 54.17    | 7.89     | 9.0      | 1999-11-09 | 2018-12-31 | 19.1       | 6747       | 96.5       |

|             |       |        |        |            |            |      |      |      |
|-------------|-------|--------|--------|------------|------------|------|------|------|
| <b>HERS</b> | 50.87 | 0.34   | 31.4   | 2001-09-14 | 2018-12-31 | 17.3 | 6170 | 97.7 |
| <b>HOBU</b> | 53.05 | 10.48  | 111.3  | 2002-06-21 | 2018-12-31 | 16.5 | 5828 | 96.5 |
| <b>HOFN</b> | 64.27 | -15.20 | 17.4   | 1997-06-29 | 2018-12-31 | 21.5 | 7413 | 94.4 |
| <b>INVR</b> | 57.49 | -4.22  | 12.8   | 2000-01-02 | 2018-05-08 | 18.3 | 6099 | 91.0 |
| <b>ISTA</b> | 41.10 | 29.02  | 109.9  | 1999-12-11 | 2018-12-31 | 19.1 | 6325 | 90.9 |
| <b>JOEN</b> | 62.39 | 30.10  | 96.4   | 1996-10-26 | 2018-12-31 | 22.2 | 7593 | 93.7 |
| <b>JOZE</b> | 52.10 | 21.03  | 110.0  | 1995-02-07 | 2018-12-31 | 23.9 | 8359 | 95.8 |
| <b>KARL</b> | 49.01 | 8.41   | 134.7  | 1997-06-29 | 2018-12-31 | 21.5 | 7469 | 95.1 |
| <b>KIRO</b> | 67.88 | 21.06  | 469.3  | 1996-11-05 | 2018-12-31 | 22.2 | 7794 | 96.3 |
| <b>KLOP</b> | 50.22 | 8.73   | 174.4  | 1997-06-30 | 2018-12-31 | 21.5 | 7461 | 95.0 |
| <b>LAMA</b> | 53.89 | 20.67  | 157.6  | 1994-12-22 | 2018-12-30 | 24.0 | 8180 | 93.2 |
| <b>LAMP</b> | 35.50 | 12.61  | 19.6   | 1999-03-26 | 2018-12-31 | 19.8 | 6341 | 87.8 |
| <b>LEED</b> | 53.80 | -1.66  | 165.3  | 2000-01-02 | 2018-12-31 | 19.0 | 6482 | 93.4 |
| <b>LEIJ</b> | 51.35 | 12.37  | 134.2  | 1997-06-30 | 2018-12-31 | 21.5 | 7414 | 94.4 |
| <b>LLIV</b> | 42.48 | 1.97   | 1414.3 | 1999-05-14 | 2018-12-31 | 19.6 | 6917 | 96.4 |
| <b>LOV0</b> | 59.34 | 17.83  | 56.1   | 1995-08-01 | 2018-12-31 | 23.4 | 8156 | 95.3 |
| <b>MAD2</b> | 40.43 | -4.25  | 776.4  | 1997-07-07 | 2018-12-31 | 21.5 | 7355 | 93.7 |
| <b>MALA</b> | 36.73 | -4.39  | 71.2   | 2000-05-05 | 2018-12-31 | 18.7 | 6652 | 97.6 |
| <b>MAN2</b> | 48.02 | 0.16   | 120.9  | 1998-04-05 | 2018-12-31 | 20.7 | 7126 | 94.1 |
| <b>MAR6</b> | 60.60 | 17.26  | 50.6   | 1996-10-26 | 2018-12-31 | 22.2 | 7926 | 97.8 |
| <b>MARS</b> | 43.28 | 5.35   | 12.2   | 1998-07-17 | 2018-12-31 | 20.5 | 7030 | 94.1 |
| <b>MATE</b> | 40.65 | 16.70  | 490.2  | 1994-01-02 | 2018-12-31 | 25.0 | 8788 | 96.3 |
| <b>MEDI</b> | 44.52 | 11.65  | 10.2   | 1995-07-28 | 2018-12-31 | 23.4 | 8005 | 93.5 |
| <b>METS</b> | 60.22 | 24.40  | 75.7   | 1994-01-02 | 2018-12-31 | 25.0 | 8361 | 91.6 |
| <b>MLVL</b> | 48.84 | 2.59   | 115.9  | 1998-03-20 | 2018-12-31 | 20.8 | 7047 | 92.8 |
| <b>MODA</b> | 45.21 | 6.71   | 1127.9 | 1998-10-17 | 2018-12-31 | 20.2 | 6412 | 86.9 |
| <b>MOPI</b> | 48.37 | 17.27  | 535.3  | 1998-05-27 | 2018-12-31 | 20.6 | 6923 | 92.0 |
| <b>NEWL</b> | 50.10 | -5.54  | 11.0   | 1998-09-30 | 2018-12-10 | 20.2 | 6685 | 90.6 |
| <b>NICO</b> | 35.14 | 33.40  | 161.9  | 1997-05-15 | 2018-12-31 | 21.6 | 6745 | 85.4 |
| <b>ONSA</b> | 57.40 | 11.93  | 8.9    | 1994-01-02 | 2018-12-31 | 25.0 | 8699 | 95.3 |
| <b>ORID</b> | 41.13 | 20.79  | 730.8  | 2000-07-13 | 2018-12-31 | 18.5 | 6262 | 92.8 |
| <b>OSLS</b> | 59.74 | 10.37  | 181.5  | 2000-10-30 | 2018-12-31 | 18.2 | 6430 | 96.9 |
| <b>OSNA</b> | 52.25 | 8.05   | 105.5  | 2000-01-01 | 2018-12-31 | 19.0 | 6528 | 94.1 |
| <b>PDEL</b> | 37.75 | -25.66 | 53.5   | 2000-02-01 | 2018-12-31 | 18.9 | 6433 | 93.1 |
| <b>PENC</b> | 47.79 | 19.28  | 248.3  | 1996-03-03 | 2018-12-31 | 22.8 | 8033 | 96.3 |
| <b>PFA2</b> | 47.52 | 9.78   | 1042.9 | 1997-04-12 | 2018-12-31 | 21.7 | 7543 | 95.1 |
| <b>POTS</b> | 52.38 | 13.07  | 104.0  | 1995-10-04 | 2018-12-31 | 23.2 | 8135 | 95.8 |
| <b>PTBB</b> | 52.30 | 10.46  | 87.2   | 2000-03-30 | 2018-12-31 | 18.8 | 6629 | 96.8 |
| <b>REYK</b> | 64.14 | -21.96 | 26.6   | 1996-01-02 | 2018-12-31 | 23.0 | 7813 | 93.0 |

|             |       |       |        |            |            |      |      |      |
|-------------|-------|-------|--------|------------|------------|------|------|------|
| <b>RIGA</b> | 56.95 | 24.06 | 13.6   | 1996-10-26 | 2018-12-31 | 22.2 | 7649 | 94.4 |
| <b>SFER</b> | 36.46 | -6.21 | 39.2   | 1998-06-03 | 2018-12-28 | 20.6 | 7007 | 93.3 |
| <b>SJDV</b> | 45.88 | 4.68  | 382.1  | 1999-03-12 | 2018-12-31 | 19.8 | 6320 | 87.4 |
| <b>SKE0</b> | 64.88 | 21.05 | 59.0   | 1996-11-02 | 2018-12-31 | 22.2 | 7912 | 97.7 |
| <b>SMID</b> | 55.64 | 9.56  | 82.5   | 2001-01-01 | 2018-12-31 | 18.0 | 6396 | 97.3 |
| <b>SMNE</b> | 48.84 | 2.43  | 81.6   | 2000-10-30 | 2018-12-31 | 18.2 | 6414 | 96.6 |
| <b>SODA</b> | 67.42 | 26.39 | 279.0  | 1996-10-26 | 2018-12-31 | 22.2 | 7192 | 88.8 |
| <b>SOFI</b> | 42.56 | 23.39 | 1074.5 | 1997-06-04 | 2018-12-31 | 21.6 | 7227 | 91.7 |
| <b>SONS</b> | 39.68 | -3.96 | 755.3  | 2000-11-25 | 2018-12-31 | 18.1 | 6460 | 97.7 |
| <b>STAS</b> | 59.02 | 5.60  | 60.8   | 2000-10-30 | 2018-12-31 | 18.2 | 6340 | 95.5 |
| <b>SULD</b> | 56.84 | 9.74  | 82.0   | 2001-01-01 | 2018-12-31 | 18.0 | 6386 | 97.1 |
| <b>TERS</b> | 53.36 | 5.22  | 14.4   | 1996-10-31 | 2018-12-31 | 22.2 | 7924 | 97.9 |
| <b>TLSE</b> | 43.56 | 1.48  | 157.7  | 2001-01-06 | 2018-12-31 | 18.0 | 6391 | 97.3 |
| <b>TORI</b> | 45.06 | 7.66  | 261.2  | 1998-07-15 | 2018-12-31 | 20.5 | 6917 | 92.5 |
| <b>TRDS</b> | 63.37 | 10.32 | 277.7  | 2000-10-30 | 2018-12-31 | 18.2 | 6380 | 96.1 |
| <b>TRO1</b> | 69.66 | 18.94 | 106.6  | 2000-06-19 | 2018-12-31 | 18.5 | 6518 | 96.3 |
| <b>TUBI</b> | 40.79 | 29.45 | 184.3  | 2002-01-01 | 2018-12-31 | 17.0 | 6020 | 97.0 |
| <b>TUOR</b> | 60.42 | 22.44 | 41.0   | 1997-01-01 | 2016-11-05 | 19.8 | 6911 | 95.3 |
| <b>UNPG</b> | 43.12 | 12.36 | 303.5  | 1997-10-15 | 2018-11-20 | 21.1 | 6976 | 90.5 |
| <b>VAAS</b> | 62.96 | 21.77 | 40.1   | 1996-10-26 | 2018-12-31 | 22.2 | 7623 | 94.1 |
| <b>VALE</b> | 39.48 | -0.34 | 27.0   | 2000-01-10 | 2018-12-31 | 19.0 | 6425 | 92.7 |
| <b>VARs</b> | 70.34 | 31.03 | 156.1  | 2000-10-30 | 2018-12-31 | 18.2 | 6343 | 95.6 |
| <b>VIL0</b> | 64.70 | 16.56 | 420.1  | 1996-10-29 | 2018-12-31 | 22.2 | 7853 | 97.0 |
| <b>VILL</b> | 40.44 | -3.95 | 595.4  | 1994-11-29 | 2018-12-31 | 24.1 | 8327 | 94.6 |
| <b>VIS0</b> | 57.65 | 18.37 | 54.7   | 1996-11-05 | 2018-12-31 | 22.2 | 7855 | 97.1 |
| <b>WARE</b> | 50.69 | 5.25  | 141.6  | 1996-01-02 | 2018-12-31 | 23.0 | 7924 | 94.3 |
| <b>WSRA</b> | 52.91 | 6.60  | 40.5   | 1997-05-17 | 2018-12-31 | 21.6 | 7709 | 97.6 |
| <b>WSRT</b> | 52.91 | 6.60  | 40.5   | 1997-06-26 | 2018-12-31 | 21.5 | 7653 | 97.4 |
| <b>WTZA</b> | 49.14 | 12.88 | 619.1  | 1997-11-26 | 2018-12-31 | 21.1 | 7301 | 94.7 |
| <b>WTZR</b> | 49.14 | 12.88 | 619.2  | 1995-12-31 | 2018-12-31 | 23.0 | 8217 | 97.8 |
| <b>WTZZ</b> | 49.14 | 12.88 | 619.1  | 1999-02-05 | 2018-12-31 | 19.9 | 7015 | 96.5 |
| <b>YEBE</b> | 40.52 | -3.09 | 920.3  | 1999-05-19 | 2018-12-31 | 19.6 | 6829 | 95.3 |
| <b>ZECK</b> | 43.79 | 41.57 | 1143.4 | 1997-07-06 | 2018-12-31 | 21.5 | 7092 | 90.4 |
| <b>ZIMM</b> | 46.88 | 7.47  | 906.7  | 1994-01-02 | 2018-12-31 | 25.0 | 8781 | 96.2 |

**Table S2.** Properties of the 108 GPS stations with their altitudes (Alt.), distance-to-sea (SeaDist), and climate zones shown with Code and Type. The climate of each station was classified according to Köppen Climate Classification (Beck et al., 2018) with a spatial resolution of about 1 km.

| Station | Lat. (°) | Lon. (°) | Alt. (m) | SeaDist (km) | Code | Type                                  |
|---------|----------|----------|----------|--------------|------|---------------------------------------|
| ABER    | 57.14    | -2.08    | 3.1      | 0.4          | Cfb  | Temperate, no dry season, warm summer |
| ACOR    | 43.36    | -8.40    | 11.9     | 0.3          | Csb  | Temperate, dry summer, warm summer    |
| ALAC    | 38.34    | -0.48    | 9.9      | 0.2          | BWh  | Arid, desert, hot                     |
| ALME    | 36.85    | -2.46    | 77.1     | 2.2          | BWh  | Arid, desert, hot                     |
| APEL    | 52.21    | 5.96     | 72.4     | 42.2         | Cfb  | Temperate, no dry season, warm summer |
| AQUI    | 42.37    | 13.35    | 664.1    | 64.0         | Cfa  | Temperate, no dry season, hot summer  |
| BELL    | 41.60    | 1.40     | 802.9    | 47.7         | Csb  | Temperate, dry summer, warm summer    |
| BOGO    | 52.48    | 21.04    | 118.8    | 223.1        | Dfb  | Cold, no dry season, warm summer      |
| BOR1    | 52.28    | 17.07    | 88.8     | 222.1        | Dfb  | Cold, no dry season, warm summer      |
| BRAS    | 44.12    | 11.11    | 857.5    | 74.4         | Dfb  | Cold, no dry season, warm summer      |
| BRST    | 48.38    | -4.50    | 14.3     | 0.1          | NaN  | Sea                                   |
| BSHM    | 32.78    | 35.02    | 204.3    | 3.4          | Csa  | Temperate, dry summer, hot summer     |
| BUCU    | 44.46    | 26.13    | 107.7    | 199.0        | Dfa  | Cold, no dry season, hot summer       |
| BUDP    | 55.74    | 12.50    | 57.7     | 5.3          | Dfb  | Cold, no dry season, warm summer      |
| BZRG    | 46.50    | 11.34    | 279.0    | 134.4        | Cfa  | Temperate, no dry season, hot summer  |
| CASC    | 38.69    | -9.42    | 22.2     | 0.5          | Csb  | Temperate, dry summer, warm summer    |
| CREU    | 42.32    | 3.32     | 83.6     | 0.4          | BSk  | Arid, steppe, cold                    |
| DARE    | 53.34    | -2.64    | 36.2     | 2.9          | Cfb  | Temperate, no dry season, warm summer |
| DELF    | 51.99    | 4.39     | 30.7     | 16.0         | Cfb  | Temperate, no dry season, warm summer |
| DENT    | 50.93    | 3.40     | 19.2     | 46.5         | Cfb  | Temperate, no dry season, warm summer |
| DOUR    | 50.09    | 4.60     | 236.4    | 141.9        | Cfb  | Temperate, no dry season, warm summer |
| EBRE    | 40.82    | 0.49     | 57.6     | 17.7         | BSk  | Arid, steppe, cold                    |
| EDIN    | 55.92    | -3.29    | 65.8     | 5.9          | Cfb  | Temperate, no dry season, warm summer |
| ELJS    | 50.76    | 5.68     | 57.6     | 120.0        | Cfb  | Temperate, no dry season, warm summer |
| ERLA    | 49.59    | 11.00    | 291.0    | 446.2        | Dfb  | Cold, no dry season, warm summer      |
| EUSK    | 50.67    | 6.76     | 198.1    | 187.4        | Cfb  | Temperate, no dry season, warm summer |
| GAIA    | 41.11    | -8.59    | 232.1    | 5.2          | Csb  | Temperate, dry summer, warm summer    |
| GENO    | 44.42    | 8.92     | 110.0    | 0.6          | Csa  | Temperate, dry summer, hot summer     |
| GLAS    | 55.85    | -4.30    | 16.9     | 9.7          | Cfb  | Temperate, no dry season, warm summer |
| GLSV    | 50.36    | 30.50    | 200.8    | 399.9        | Dfb  | Cold, no dry season, warm summer      |
| GOPE    | 49.91    | 14.79    | 547.6    | 410.3        | Dfb  | Cold, no dry season, warm summer      |
| GRAS    | 43.75    | 6.92     | 1268.2   | 21.7         | Csb  | Temperate, dry summer, warm summer    |
| GRAZ    | 47.07    | 15.49    | 490.8    | 203.3        | Dfb  | Cold, no dry season, warm summer      |
| GSR1    | 46.05    | 14.54    | 304.8    | 73.9         | Dfb  | Cold, no dry season, warm summer      |

|             |       |        |        |       |     |                                       |
|-------------|-------|--------|--------|-------|-----|---------------------------------------|
| <b>HELG</b> | 54.17 | 7.89   | 9.0    | 0.2   | NaN | Sea                                   |
| <b>HERS</b> | 50.87 | 0.34   | 31.4   | 6.2   | Cfb | Temperate, no dry season, warm summer |
| <b>HOBU</b> | 53.05 | 10.48  | 111.3  | 68.8  | Cfb | Temperate, no dry season, warm summer |
| <b>HOFN</b> | 64.27 | -15.20 | 17.4   | 0.4   | ET  | Polar, tundra                         |
| <b>INVR</b> | 57.49 | -4.22  | 12.8   | 0.9   | Cfb | Temperate, no dry season, warm summer |
| <b>ISTA</b> | 41.10 | 29.02  | 109.9  | 3.0   | Csa | Temperate, dry summer, hot summer     |
| <b>JOEN</b> | 62.39 | 30.10  | 96.4   | 198.2 | Dfc | Cold, no dry season, cold summer      |
| <b>JOZE</b> | 52.10 | 21.03  | 110.0  | 260.7 | Dfb | Cold, no dry season, warm summer      |
| <b>KARL</b> | 49.01 | 8.41   | 134.7  | 394.3 | Cfb | Temperate, no dry season, warm summer |
| <b>KIR0</b> | 67.88 | 21.06  | 469.3  | 143.6 | Dfc | Cold, no dry season, cold summer      |
| <b>KLOP</b> | 50.22 | 8.73   | 174.4  | 330.4 | Cfb | Temperate, no dry season, warm summer |
| <b>LAMA</b> | 53.89 | 20.67  | 157.6  | 82.3  | Dfb | Cold, no dry season, warm summer      |
| <b>LAMP</b> | 35.50 | 12.61  | 19.6   | 0.5   | BSh | Arid, steppe, hot                     |
| <b>LEED</b> | 53.80 | -1.66  | 165.3  | 59.2  | Cfb | Temperate, no dry season, warm summer |
| <b>LEIJ</b> | 51.35 | 12.37  | 134.2  | 289.2 | Cfb | Temperate, no dry season, warm summer |
| <b>LLIV</b> | 42.48 | 1.97   | 1414.3 | 88.0  | Cfb | Temperate, no dry season, warm summer |
| <b>LOV0</b> | 59.34 | 17.83  | 56.1   | 13.5  | Dfb | Cold, no dry season, warm summer      |
| <b>MAD2</b> | 40.43 | -4.25  | 776.4  | 328.0 | BSk | Arid, steppe, cold                    |
| <b>MALA</b> | 36.73 | -4.39  | 71.2   | 0.5   | Csa | Temperate, dry summer, hot summer     |
| <b>MAN2</b> | 48.02 | 0.16   | 120.9  | 131.1 | Cfb | Temperate, no dry season, warm summer |
| <b>MAR6</b> | 60.60 | 17.26  | 50.6   | 7.5   | Dfb | Cold, no dry season, warm summer      |
| <b>MARS</b> | 43.28 | 5.35   | 12.2   | 0.8   | BSk | Arid, steppe, cold                    |
| <b>MATE</b> | 40.65 | 16.70  | 490.2  | 28.7  | Csa | Temperate, dry summer, hot summer     |
| <b>MEDI</b> | 44.52 | 11.65  | 10.2   | 49.8  | Cfa | Temperate, no dry season, hot summer  |
| <b>METS</b> | 60.22 | 24.40  | 75.7   | 10.4  | Dfb | Cold, no dry season, warm summer      |
| <b>MLVL</b> | 48.84 | 2.59   | 115.9  | 160.8 | Cfb | Temperate, no dry season, warm summer |
| <b>MODA</b> | 45.21 | 6.71   | 1127.9 | 171.2 | Dfb | Cold, no dry season, warm summer      |
| <b>MOPI</b> | 48.37 | 17.27  | 535.3  | 399.5 | Dfb | Cold, no dry season, warm summer      |
| <b>NEWL</b> | 50.10 | -5.54  | 11.0   | 0.5   | Cfb | Temperate, no dry season, warm summer |
| <b>NICO</b> | 35.14 | 33.40  | 161.9  | 21.5  | BSh | Arid, steppe, hot                     |
| <b>ONSA</b> | 57.40 | 11.93  | 8.9    | 0.3   | Dfb | Cold, no dry season, warm summer      |
| <b>ORID</b> | 41.13 | 20.79  | 730.8  | 107.5 | Cfb | Temperate, no dry season, warm summer |
| <b>OSLS</b> | 59.74 | 10.37  | 181.5  | 8.1   | Dfb | Cold, no dry season, warm summer      |
| <b>OSNA</b> | 52.25 | 8.05   | 105.5  | 115.4 | Cfb | Temperate, no dry season, warm summer |
| <b>PDEL</b> | 37.75 | -25.66 | 53.5   | 0.9   | Csa | Temperate, dry summer, hot summer     |
| <b>PENC</b> | 47.79 | 19.28  | 248.3  | 451.5 | Dfb | Cold, no dry season, warm summer      |
| <b>PFA2</b> | 47.52 | 9.78   | 1042.9 | 295.5 | Dfb | Cold, no dry season, warm summer      |
| <b>POTS</b> | 52.38 | 13.07  | 104.0  | 165.9 | Dfb | Cold, no dry season, warm summer      |
| <b>PTBB</b> | 52.30 | 10.46  | 87.2   | 143.8 | Cfb | Temperate, no dry season, warm summer |

|             |       |        |        |       |     |                                       |
|-------------|-------|--------|--------|-------|-----|---------------------------------------|
| <b>REYK</b> | 64.14 | -21.96 | 26.6   | 0.7   | Dfc | Cold, no dry season, cold summer      |
| <b>RIGA</b> | 56.95 | 24.06  | 13.6   | 7.9   | Dfb | Cold, no dry season, warm summer      |
| <b>SFER</b> | 36.46 | -6.21  | 39.2   | 1.1   | Csa | Temperate, dry summer, hot summer     |
| <b>SJDV</b> | 45.88 | 4.68   | 382.1  | 261.9 | Cfb | Temperate, no dry season, warm summer |
| <b>SKE0</b> | 64.88 | 21.05  | 59.0   | 1.4   | Dfc | Cold, no dry season, cold summer      |
| <b>SMID</b> | 55.64 | 9.56   | 82.5   | 5.9   | Dfb | Cold, no dry season, warm summer      |
| <b>SMNE</b> | 48.84 | 2.43   | 81.6   | 153.4 | Cfb | Temperate, no dry season, warm summer |
| <b>SODA</b> | 67.42 | 26.39  | 279.0  | 192.4 | Dfc | Cold, no dry season, cold summer      |
| <b>SOFI</b> | 42.56 | 23.39  | 1074.5 | 198.7 | Dfb | Cold, no dry season, warm summer      |
| <b>SONS</b> | 39.68 | -3.96  | 755.3  | 311.8 | BSk | Arid, steppe, cold                    |
| <b>STAS</b> | 59.02 | 5.60   | 60.8   | 0.5   | Cfb | Temperate, no dry season, warm summer |
| <b>SULD</b> | 56.84 | 9.74   | 82.0   | 27.3  | Dfb | Cold, no dry season, warm summer      |
| <b>TERS</b> | 53.36 | 5.22   | 14.4   | 0.4   | NaN | Sea                                   |
| <b>TLSE</b> | 43.56 | 1.48   | 157.7  | 136.0 | Cfa | Temperate, no dry season, hot summer  |
| <b>TORI</b> | 45.06 | 7.66   | 261.2  | 105.6 | Cfa | Temperate, no dry season, hot summer  |
| <b>TRDS</b> | 63.37 | 10.32  | 277.7  | 4.6   | Dfc | Cold, no dry season, cold summer      |
| <b>TRO1</b> | 69.66 | 18.94  | 106.6  | 1.1   | Dfc | Cold, no dry season, cold summer      |
| <b>TUBI</b> | 40.79 | 29.45  | 184.3  | 1.9   | Csa | Temperate, dry summer, hot summer     |
| <b>TUOR</b> | 60.42 | 22.44  | 41.0   | 0.9   | Dfb | Cold, no dry season, warm summer      |
| <b>UNPG</b> | 43.12 | 12.36  | 303.5  | 96.3  | Cfa | Temperate, no dry season, hot summer  |
| <b>VAAS</b> | 62.96 | 21.77  | 40.1   | 10.4  | Dfc | Cold, no dry season, cold summer      |
| <b>VALE</b> | 39.48 | -0.34  | 27.0   | 1.2   | BSk | Arid, steppe, cold                    |
| <b>VARs</b> | 70.34 | 31.03  | 156.1  | 0.9   | ET  | Polar, tundra                         |
| <b>VIL0</b> | 64.70 | 16.56  | 420.1  | 182.4 | Dfc | Cold, no dry season, cold summer      |
| <b>VILL</b> | 40.44 | -3.95  | 595.4  | 326.2 | BSk | Arid, steppe, cold                    |
| <b>VIS0</b> | 57.65 | 18.37  | 54.7   | 2.5   | Dfb | Cold, no dry season, warm summer      |
| <b>WARE</b> | 50.69 | 5.25   | 141.6  | 101.3 | Cfb | Temperate, no dry season, warm summer |
| <b>WSRA</b> | 52.91 | 6.60   | 40.5   | 50.3  | Cfb | Temperate, no dry season, warm summer |
| <b>WSRT</b> | 52.91 | 6.60   | 40.5   | 50.3  | Cfb | Temperate, no dry season, warm summer |
| <b>WTZA</b> | 49.14 | 12.88  | 619.1  | 375.3 | Dfb | Cold, no dry season, warm summer      |
| <b>WTZR</b> | 49.14 | 12.88  | 619.2  | 375.3 | Dfb | Cold, no dry season, warm summer      |
| <b>WTZZ</b> | 49.14 | 12.88  | 619.1  | 375.3 | Dfb | Cold, no dry season, warm summer      |
| <b>YEBE</b> | 40.52 | -3.09  | 920.3  | 261.0 | BSk | Arid, steppe, cold                    |
| <b>ZECK</b> | 43.79 | 41.57  | 1143.4 | 98.0  | Dfb | Cold, no dry season, warm summer      |
| <b>ZIMM</b> | 46.88 | 7.47   | 906.7  | 290.1 | Dfb | Cold, no dry season, warm summer      |

**Table S3.** The IWV trend estimates with realistic uncertainties at the 108 stations. The specific optimal noise model for each IWV time series is also given. For the GPS-reanalyses IWV trend comparison, the relative IWV trend (in % decade<sup>-1</sup>) is calculated as the ratio between the IWV trend (in kg m<sup>-2</sup> decade<sup>-1</sup>) and the average monthly IWV of the specific IWV time series. Note that the Table S3 is provided as a single file named as ***Table S3\_ACP-2021-797.xlsx*** with eight sheets in the supplementary material.
