# Supplementary material for: Characterisations of Europe's integrated water vapour and assessments of atmospheric reanalyses using more than 2 decades of ground-based GPS
Source: Copernicus journal article supplement (doi:10.5194/acp-23-3517-2023), 2023-03-21
Supplement: Supplementary file 1 [file acp-23-3517-2023-supplement.zip › Table S3_ ACP-2021-797.xlsx]

## Sheet: Homogenised GPS
Station	Relative trend (% decade-1)	Trend (kg m-2 decade-1)	Standard deviation of trend (kg m-2 decade-1)	Optimal noise model
ABER	1.74	0.25	0.32	PL
ACOR	2.82	0.52	0.26	AR1
ALAC	4.54	0.93	0.22	AR1
ALME	4.47	0.86	0.28	AR1
APEL	2.49	0.38	0.27	AR1
AQUI	4.11	0.62	0.26	AR1
BELL	6.04	0.82	0.2	AR1
BOGO	4.51	0.68	0.19	WN
BOR1	4.1	0.63	0.15	WN
BRAS	3.8	0.52	0.2	WN
BRST	1.73	0.3	0.27	AR1
BSHM	6.2	1.02	0.23	AR1
BUCU	3.56	0.64	0.25	AR1
BUDP	2.69	0.39	0.28	AR1
BZRG	4.66	0.82	0.26	AR1
CASC	1.02	0.18	0.36	AR1
CREU	5.33	0.98	0.36	AR1
DARE	1.71	0.27	0.23	ARMA11
DELF	1.38	0.22	0.17	ARMA11
DENT	1.48	0.24	0.18	ARMA11
DOUR	1.62	0.25	0.17	ARMA11
EBRE	4.07	0.82	0.23	AR1
EDIN	0.62	0.09	0.24	AR1
EIJS	1.72	0.28	0.18	ARMA11
ERLA	2.55	0.4	0.17	ARMA11
EUSK	2.08	0.32	0.18	ARMA11
GAIA	2.42	0.41	0.35	AR1
GENO	4.19	0.8	0.33	AR1
GLAS	0.73	0.11	0.24	AR1
GLSV	3.42	0.5	0.18	WN
GOPE	4.23	0.56	0.13	ARMA11
GRAS	4.57	0.49	0.15	AR1
GRAZ	4.02	0.62	0.14	WN
GSR1	4.67	0.83	0.25	WN
HELG	1.69	0.26	0.25	AR1
HERS	1.62	0.27	0.28	AR1
HOBU	2.57	0.39	0.24	AR1
HOFN	2.91	0.32	0.2	AR1
INVR	-0.07	-0.01	0.19	ARMA11
ISTA	5.67	1.05	0.43	ARMA11
JOEN	3.94	0.46	0.16	WN
JOZE	4.02	0.62	0.16	WN
KARL	3.32	0.56	0.18	WN
KIR0	0.45	0.04	0.12	WN
KLOP	2.01	0.32	0.18	ARMA11
LAMA	3.03	0.43	0.2	AR1
LAMP	3.74	0.76	0.27	AR1
LEED	0.61	0.09	0.24	AR1
LEIJ	2.22	0.35	0.33	PL
LLIV	3.93	0.42	0.15	WN
LOV0	0.38	0.05	0.2	AR1
MAD2	1.96	0.27	0.23	AR1
MALA	2.4	0.46	0.3	AR1
MAN2	1.26	0.21	0.2	WN
MAR6	1.23	0.16	0.18	AR1
MARS	6.5	1.17	0.22	WN
MATE	3.75	0.6	0.19	AR1
MEDI	3.48	0.68	0.23	AR1
METS	2.34	0.29	0.16	AR1
MLVL	4.32	0.73	0.25	ARMA11
MODA	4.21	0.49	0.14	WN
MOPI	3.21	0.43	0.2	AR1
NEWL	2.4	0.4	0.27	AR1
NICO	4.48	0.78	0.43	PL
ONSA	3.67	0.5	0.18	AR1
ORID	3.42	0.52	0.25	AR1
OSLS	2.08	0.26	0.24	AR1
OSNA	1.62	0.25	0.23	ARMA11
PDEL	-0.71	-0.16	0.25	WN
PENC	4.45	0.74	0.21	AR1
PFA2	5.97	0.73	0.15	AR1
POTS	3.6	0.54	0.15	WN
PTBB	2.18	0.34	0.25	AR1
REYK	1.53	0.17	0.16	AR1
RIGA	1.91	0.26	0.22	AR1
SFER	2.01	0.37	0.23	WN
SJDV	3.69	0.59	0.18	WN
SKE0	-0.17	-0.02	0.17	AR1
SMID	2.55	0.37	0.28	AR1
SMNE	2.61	0.44	0.24	WN
SODA	2.75	0.27	0.16	AR1
SOFI	6.25	0.81	0.17	AR1
SONS	1.13	0.15	0.27	AR1
STAS	1.71	0.23	0.27	AR1
SULD	3.08	0.42	0.27	AR1
TERS	1.22	0.19	0.2	AR1
TLSE	3.55	0.65	0.24	WN
TORI	3.86	0.7	0.2	WN
TRDS	1.05	0.12	0.23	AR1
TRO1	0.9	0.09	0.16	WN
TUBI	8.74	1.58	0.56	PL
TUOR	1.73	0.22	0.23	AR1
UNPG	2.81	0.5	0.27	AR1
VAAS	2.72	0.33	0.2	AR1
VALE	4.2	0.87	0.27	AR1
VARS	4.98	0.45	0.17	WN
VIL0	0.89	0.09	0.15	AR1
VILL	0.6	0.09	0.22	AR1
VIS0	0.6	0.08	0.19	AR1
WARE	2.05	0.32	0.17	ARMA11
WSRA	0.58	0.09	0.21	AR1
WSRT	0.65	0.1	0.21	AR1
WTZA	2.88	0.39	0.14	WN
WTZR	4.77	0.66	0.13	WN
WTZZ	3.69	0.51	0.16	WN
YEBE	3.92	0.51	0.25	AR1
ZECK	3.94	0.5	0.18	AR1
ZIMM	1.29	0.17	0.11	WN

## Sheet: Unhomogenised GPS
Station	Relative trend (% decade-1)	Trend (kg m-2 decade-1)	Standard deviation of trend (kg m-2 decade-1)	Optimal noise model
ABER	1.74	0.25	0.32	PL
ACOR	2.82	0.52	0.26	AR1
ALAC	4.54	0.93	0.22	AR1
ALME	4.47	0.86	0.28	AR1
APEL	1.82	0.28	0.28	AR1
AQUI	4.11	0.62	0.26	AR1
BELL	5.63	0.82	0.37	PL
BOGO	4.51	0.68	0.19	WN
BOR1	4.1	0.63	0.15	WN
BRAS	3.8	0.52	0.2	WN
BRST	3.22	0.55	0.28	AR1
BSHM	6.2	1.02	0.23	AR1
BUCU	3.56	0.64	0.25	AR1
BUDP	2.69	0.39	0.28	AR1
BZRG	4.66	0.82	0.26	AR1
CASC	1.02	0.18	0.36	AR1
CREU	2.18	0.42	0.36	AR1
DARE	1.71	0.27	0.23	ARMA11
DELF	1.95	0.31	0.17	ARMA11
DENT	1.48	0.24	0.18	ARMA11
DOUR	2.52	0.38	0.17	ARMA11
EBRE	4.07	0.82	0.23	AR1
EDIN	0.62	0.09	0.24	AR1
EIJS	2.22	0.36	0.19	ARMA11
ERLA	0.89	0.14	0.17	ARMA11
EUSK	0.26	0.04	0.19	ARMA11
GAIA	2.42	0.41	0.35	AR1
GENO	4.19	0.8	0.33	AR1
GLAS	0.73	0.11	0.24	AR1
GLSV	3.42	0.5	0.18	WN
GOPE	-0.36	-0.05	0.32	ARMA11
GRAS	4.57	0.49	0.15	AR1
GRAZ	4.02	0.62	0.14	WN
GSR1	4.67	0.83	0.25	WN
HELG	2.14	0.33	0.25	AR1
HERS	4.32	0.71	0.28	AR1
HOBU	2.43	0.37	0.25	AR1
HOFN	-0.89	-0.1	0.2	AR1
INVR	-0.07	-0.01	0.19	ARMA11
ISTA	5.67	1.05	0.43	ARMA11
JOEN	3.94	0.46	0.16	WN
JOZE	4.02	0.62	0.16	WN
KARL	1.71	0.29	0.22	AR1
KIR0	0.45	0.04	0.12	WN
KLOP	0.37	0.06	0.19	ARMA11
LAMA	3.03	0.43	0.2	AR1
LAMP	2.54	0.52	0.29	AR1
LEED	2.75	0.4	0.24	AR1
LEIJ	3.45	0.54	0.34	PL
LLIV	3.93	0.42	0.15	WN
LOV0	0.38	0.05	0.2	AR1
MAD2	1.96	0.27	0.23	AR1
MALA	2.4	0.46	0.3	AR1
MAN2	2.53	0.42	0.2	WN
MAR6	1.23	0.16	0.18	AR1
MARS	6.5	1.17	0.22	WN
MATE	3.75	0.6	0.19	AR1
MEDI	3.48	0.68	0.23	AR1
METS	2.34	0.29	0.16	AR1
MLVL	4.32	0.73	0.25	ARMA11
MODA	3.68	0.43	0.14	WN
MOPI	0.74	0.1	0.21	AR1
NEWL	2.4	0.4	0.27	AR1
NICO	4.48	0.78	0.43	PL
ONSA	3.67	0.5	0.18	AR1
ORID	3.42	0.52	0.25	AR1
OSLS	2.08	0.26	0.24	AR1
OSNA	0.58	0.09	0.23	ARMA11
PDEL	-0.71	-0.16	0.25	WN
PENC	5.05	0.84	0.21	AR1
PFA2	5.97	0.73	0.15	AR1
POTS	3.6	0.54	0.15	WN
PTBB	0.31	0.05	0.24	AR1
REYK	2.56	0.28	0.16	AR1
RIGA	1.91	0.26	0.22	AR1
SFER	2.01	0.37	0.23	WN
SJDV	3.69	0.59	0.18	WN
SKE0	-0.17	-0.02	0.17	AR1
SMID	2.55	0.37	0.28	AR1
SMNE	2.61	0.44	0.24	WN
SODA	2.75	0.27	0.16	AR1
SOFI	6.25	0.81	0.17	AR1
SONS	1.13	0.15	0.27	AR1
STAS	1.71	0.23	0.27	AR1
SULD	0.65	0.09	0.27	AR1
TERS	1.5	0.23	0.21	AR1
TLSE	3.55	0.65	0.24	WN
TORI	3.86	0.7	0.2	WN
TRDS	2.73	0.31	0.23	AR1
TRO1	0.9	0.09	0.16	WN
TUBI	8.74	1.58	0.56	PL
TUOR	1.73	0.22	0.23	AR1
UNPG	2.81	0.5	0.27	AR1
VAAS	2.72	0.33	0.2	AR1
VALE	4.2	0.87	0.27	AR1
VARS	4.98	0.45	0.17	WN
VIL0	0.89	0.09	0.15	AR1
VILL	0.6	0.09	0.22	AR1
VIS0	0.6	0.08	0.19	AR1
WARE	2.05	0.32	0.17	ARMA11
WSRA	0.85	0.13	0.21	AR1
WSRT	0.65	0.1	0.21	AR1
WTZA	2.88	0.39	0.14	WN
WTZR	4.77	0.66	0.13	WN
WTZZ	3.69	0.51	0.16	WN
YEBE	3.92	0.51	0.25	AR1
ZECK	3.94	0.5	0.18	AR1
ZIMM	1.29	0.17	0.11	WN

## Sheet: CFSR
Station	Relative trend (% decade-1)	Trend (kg m-2 decade-1)	Standard deviation of trend (kg m-2 decade-1)	Optimal noise model
ABER	0	0	0.21	AR1
ACOR	1.45	0.29	0.26	AR1
ALAC	2.77	0.59	0.34	PL
ALME	4.6	0.92	0.29	AR1
APEL	2.24	0.36	0.28	AR1
AQUI	3.84	0.64	0.28	AR1
BELL	8.82	1.3	0.21	AR1
BOGO	4.83	0.75	0.19	WN
BOR1	4.59	0.73	0.15	WN
BRAS	1.92	0.27	0.19	WN
BRST	1.73	0.31	0.26	AR1
BSHM	4.74	0.82	0.25	AR1
BUCU	8.46	1.55	0.27	AR1
BUDP	3.14	0.47	0.29	AR1
BZRG	0.78	0.15	0.26	AR1
CASC	1.54	0.29	0.36	AR1
CREU	5.05	0.98	0.36	AR1
DARE	1.27	0.21	0.23	ARMA11
DELF	2.12	0.35	0.18	ARMA11
DENT	1.96	0.33	0.18	ARMA11
DOUR	2.57	0.4	0.17	ARMA11
EBRE	5.56	1.14	0.24	AR1
EDIN	1.77	0.28	0.25	AR1
EIJS	1.08	0.18	0.18	ARMA11
ERLA	2.74	0.43	0.18	ARMA11
EUSK	1.53	0.24	0.21	AR1
GAIA	2.49	0.42	0.34	AR1
GENO	-0.88	-0.18	0.33	AR1
GLAS	0.8	0.13	0.25	AR1
GLSV	3.81	0.58	0.18	WN
GOPE	5.29	0.74	0.14	ARMA11
GRAS	5.11	0.57	0.14	AR1
GRAZ	-0.44	-0.07	0.14	WN
GSR1	0.48	0.09	0.43	PL
HELG	1.44	0.23	0.26	AR1
HERS	0.87	0.15	0.25	ARMA11
HOBU	2.58	0.4	0.25	AR1
HOFN	2.16	0.26	0.19	AR1
INVR	-0.45	-0.07	0.2	ARMA11
ISTA	6.44	1.22	0.43	ARMA11
JOEN	3.22	0.4	0.15	WN
JOZE	5.2	0.82	0.16	WN
KARL	4.98	0.84	0.23	AR1
KIR0	0.85	0.08	0.12	WN
KLOP	1.7	0.27	0.18	ARMA11
LAMA	3.5	0.52	0.2	AR1
LAMP	3.31	0.68	0.27	AR1
LEED	2	0.31	0.25	AR1
LEIJ	3.99	0.63	0.39	PL
LLIV	7.38	0.93	0.16	WN
LOV0	1.01	0.14	0.21	AR1
MAD2	2.99	0.4	0.43	PL
MALA	1.96	0.39	0.32	AR1
MAN2	2.71	0.47	0.2	WN
MAR6	1.11	0.15	0.19	AR1
MARS	3.64	0.7	0.23	WN
MATE	5.05	0.84	0.2	AR1
MEDI	3.81	0.77	0.23	AR1
METS	3.25	0.42	0.17	AR1
MLVL	3.84	0.66	0.26	ARMA11
MODA	3.84	0.54	0.18	WN
MOPI	1.84	0.27	0.2	AR1
NEWL	0.91	0.16	0.25	AR1
NICO	4.63	0.88	0.45	PL
ONSA	3.94	0.57	0.18	AR1
ORID	7.48	1.21	0.29	AR1
OSLS	0.15	0.02	0.25	AR1
OSNA	1.34	0.21	0.22	ARMA11
PDEL	0.04	0.01	0.24	WN
PENC	3.88	0.64	0.21	AR1
PFA2	6.31	0.75	0.15	AR1
POTS	3.84	0.6	0.26	PL
PTBB	2.02	0.32	0.27	AR1
REYK	1.99	0.24	0.17	AR1
RIGA	2.37	0.34	0.22	AR1
SFER	4.05	0.77	0.37	PL
SJDV	4.92	0.83	0.24	AR1
SKE0	0.33	0.04	0.17	AR1
SMID	3.02	0.45	0.27	AR1
SMNE	4.6	0.8	0.29	AR1
SODA	2.6	0.27	0.13	WN
SOFI	7.99	1.02	0.18	AR1
SONS	4.82	0.67	0.28	AR1
STAS	2.12	0.3	0.28	AR1
SULD	2.83	0.41	0.27	AR1
TERS	1.97	0.32	0.21	AR1
TLSE	8.1	1.54	0.24	WN
TORI	4.42	0.78	0.19	WN
TRDS	-0.25	-0.03	0.23	AR1
TRO1	-1.01	-0.11	0.17	WN
TUBI	9.38	1.74	0.59	PL
TUOR	2.94	0.39	0.21	WN
UNPG	2.73	0.49	0.26	AR1
VAAS	1.96	0.25	0.16	WN
VALE	6.46	1.33	0.29	AR1
VARS	2.29	0.23	0.17	WN
VIL0	-0.19	-0.02	0.15	AR1
VILL	2.42	0.35	0.22	AR1
VIS0	0.87	0.12	0.19	AR1
WARE	1.91	0.3	0.17	ARMA11
WSRA	1.55	0.25	0.23	AR1
WSRT	1.3	0.21	0.23	AR1
WTZA	2.09	0.29	0.15	WN
WTZR	2.75	0.38	0.13	WN
WTZZ	2.45	0.34	0.17	WN
YEBE	7.77	1	0.24	AR1
ZECK	8.36	1.14	0.23	AR1
ZIMM	4.96	0.63	0.11	WN

## Sheet: ERA5
Station	Relative trend (% decade-1)	Trend (kg m-2 decade-1)	Standard deviation of trend (kg m-2 decade-1)	Optimal noise model
ABER	0.48	0.07	0.2	AR1
ACOR	3.56	0.67	0.25	AR1
ALAC	5.06	1.05	0.23	AR1
ALME	4.61	0.93	0.29	AR1
APEL	2.44	0.39	0.24	ARMA11
AQUI	4.3	0.7	0.26	AR1
BELL	4.56	0.65	0.2	AR1
BOGO	3.26	0.5	0.18	WN
BOR1	3.01	0.47	0.15	WN
BRAS	5.36	0.72	0.18	WN
BRST	2.33	0.4	0.26	AR1
BSHM	4.6	0.76	0.23	AR1
BUCU	2.77	0.51	0.25	AR1
BUDP	3.84	0.55	0.28	AR1
BZRG	2.57	0.48	0.25	AR1
CASC	2.62	0.47	0.33	AR1
CREU	6.2	1.16	0.37	AR1
DARE	1.58	0.25	0.27	AR1
DELF	1.72	0.28	0.17	ARMA11
DENT	1.92	0.32	0.17	ARMA11
DOUR	2.45	0.38	0.17	ARMA11
EBRE	3.15	0.65	0.24	AR1
EDIN	0.54	0.08	0.24	AR1
EIJS	1.93	0.32	0.18	ARMA11
ERLA	2.27	0.36	0.17	ARMA11
EUSK	2.02	0.32	0.19	ARMA11
GAIA	3.08	0.51	0.33	AR1
GENO	4.15	0.81	0.29	AR1
GLAS	0.46	0.07	0.24	AR1
GLSV	2.39	0.36	0.18	WN
GOPE	3.52	0.49	0.13	ARMA11
GRAS	4.01	0.44	0.13	AR1
GRAZ	2.86	0.45	0.13	WN
GSR1	5.3	0.96	0.24	WN
HELG	2.2	0.34	0.25	AR1
HERS	2.6	0.43	0.28	AR1
HOBU	2.82	0.43	0.24	AR1
HOFN	1.39	0.16	0.19	AR1
INVR	-0.75	-0.11	0.19	ARMA11
ISTA	6.27	1.14	0.41	ARMA11
JOEN	3.25	0.39	0.15	WN
JOZE	3.59	0.56	0.16	WN
KARL	2.82	0.48	0.21	AR1
KIR0	1.44	0.13	0.12	WN
KLOP	2.1	0.34	0.18	ARMA11
LAMA	2.14	0.31	0.2	AR1
LAMP	5.04	1	0.27	AR1
LEED	0.88	0.13	0.24	AR1
LEIJ	2.77	0.44	0.21	WN
LLIV	4.59	0.52	0.14	WN
LOV0	1.52	0.2	0.2	AR1
MAD2	1.65	0.23	0.22	AR1
MALA	2.51	0.5	0.29	AR1
MAN2	1.49	0.25	0.19	WN
MAR6	1.47	0.19	0.18	AR1
MARS	3.84	0.71	0.22	WN
MATE	5.63	0.9	0.19	AR1
MEDI	4.91	0.99	0.22	AR1
METS	2.55	0.32	0.16	AR1
MLVL	2.5	0.42	0.25	ARMA11
MODA	3.79	0.5	0.16	WN
MOPI	3.28	0.48	0.19	AR1
NEWL	1.67	0.28	0.25	AR1
NICO	5.12	0.89	0.43	PL
ONSA	3.43	0.48	0.17	AR1
ORID	3.84	0.6	0.25	AR1
OSLS	1.99	0.25	0.23	AR1
OSNA	1.78	0.28	0.23	ARMA11
PDEL	1.07	0.24	0.25	WN
PENC	4.05	0.68	0.2	AR1
PFA2	4.23	0.5	0.14	AR1
POTS	2.84	0.44	0.15	WN
PTBB	2.27	0.36	0.25	AR1
REYK	1.85	0.21	0.16	AR1
RIGA	0.93	0.13	0.22	AR1
SFER	3.55	0.66	0.23	WN
SJDV	2.64	0.43	0.18	WN
SKE0	1.81	0.21	0.17	AR1
SMID	3.57	0.51	0.27	AR1
SMNE	2.83	0.48	0.23	WN
SODA	2.62	0.26	0.13	WN
SOFI	3.26	0.41	0.17	AR1
SONS	2	0.28	0.27	AR1
STAS	2.27	0.31	0.27	AR1
SULD	3.54	0.49	0.26	AR1
TERS	0.77	0.12	0.2	AR1
TLSE	2.57	0.48	0.24	WN
TORI	5.01	0.92	0.19	WN
TRDS	0.88	0.1	0.22	AR1
TRO1	2.22	0.23	0.17	WN
TUBI	7.38	1.31	0.52	PL
TUOR	2.18	0.28	0.23	AR1
UNPG	4.45	0.78	0.25	AR1
VAAS	3.02	0.37	0.18	AR1
VALE	3.46	0.72	0.28	AR1
VARS	4.25	0.4	0.17	WN
VIL0	1.57	0.16	0.15	AR1
VILL	0.73	0.11	0.21	AR1
VIS0	1.35	0.18	0.19	AR1
WARE	2.44	0.39	0.17	ARMA11
WSRA	1.2	0.19	0.22	AR1
WSRT	0.94	0.15	0.22	AR1
WTZA	2.99	0.42	0.15	ARMA11
WTZR	3.65	0.51	0.14	ARMA11
WTZZ	3.27	0.46	0.16	WN
YEBE	4.45	0.58	0.24	AR1
ZECK	3.38	0.46	0.3	PL
ZIMM	2.78	0.36	0.11	WN

## Sheet: ERAI
Station	Relative trend (% decade-1)	Trend (kg m-2 decade-1)	Standard deviation of trend (kg m-2 decade-1)	Optimal noise model
ABER	0.74	0.11	0.2	AR1
ACOR	2.47	0.47	0.26	AR1
ALAC	5.96	1.25	0.23	AR1
ALME	4.51	0.94	0.3	AR1
APEL	1.81	0.29	0.23	ARMA11
AQUI	4.4	0.69	0.26	AR1
BELL	5.66	0.82	0.2	AR1
BOGO	3.16	0.49	0.19	WN
BOR1	3.24	0.51	0.24	PL
BRAS	6.14	0.83	0.19	WN
BRST	2.01	0.35	0.26	AR1
BSHM	2.93	0.49	0.38	PL
BUCU	3.22	0.6	0.24	AR1
BUDP	3.06	0.44	0.28	AR1
BZRG	3.93	0.81	0.24	WN
CASC	2.67	0.49	0.33	AR1
CREU	6.78	1.3	0.37	AR1
DARE	1.24	0.2	0.27	AR1
DELF	1.47	0.24	0.17	ARMA11
DENT	1.9	0.32	0.18	ARMA11
DOUR	2.63	0.41	0.17	ARMA11
EBRE	4.82	1	0.23	AR1
EDIN	0.78	0.12	0.24	AR1
EIJS	1.95	0.33	0.18	ARMA11
ERLA	2.58	0.41	0.17	ARMA11
EUSK	1.93	0.31	0.19	ARMA11
GAIA	3.22	0.54	0.33	AR1
GENO	3.5	0.67	0.28	AR1
GLAS	0.38	0.06	0.24	AR1
GLSV	2.56	0.39	0.18	WN
GOPE	3.22	0.45	0.14	ARMA11
GRAS	3.82	0.42	0.13	AR1
GRAZ	3.19	0.52	0.14	WN
GSR1	5.64	1.05	0.25	WN
HELG	2.26	0.35	0.25	AR1
HERS	1.97	0.33	0.24	ARMA11
HOBU	2.41	0.37	0.24	AR1
HOFN	1.16	0.14	0.19	AR1
INVR	-0.79	-0.12	0.2	ARMA11
ISTA	5.42	0.99	0.42	ARMA11
JOEN	3.23	0.4	0.16	WN
JOZE	3.74	0.59	0.16	WN
KARL	3.05	0.53	0.21	AR1
KIR0	0.95	0.09	0.12	WN
KLOP	2.49	0.41	0.18	ARMA11
LAMA	2.18	0.32	0.2	AR1
LAMP	6.16	1.26	0.27	AR1
LEED	0.8	0.12	0.24	AR1
LEIJ	2.5	0.4	0.21	WN
LLIV	4.46	0.48	0.14	WN
LOV0	1.2	0.16	0.2	AR1
MAD2	1.91	0.27	0.22	AR1
MALA	2.14	0.43	0.3	AR1
MAN2	0.83	0.14	0.19	WN
MAR6	1.36	0.18	0.18	AR1
MARS	3.88	0.73	0.22	WN
MATE	5.47	0.89	0.19	AR1
MEDI	4.53	0.92	0.22	AR1
METS	2.75	0.35	0.16	AR1
MLVL	1.78	0.3	0.25	ARMA11
MODA	3.24	0.41	0.16	WN
MOPI	3.17	0.46	0.2	AR1
NEWL	1.53	0.26	0.25	AR1
NICO	4.06	0.71	0.43	PL
ONSA	3.45	0.49	0.17	AR1
ORID	5.8	0.95	0.27	AR1
OSLS	0.69	0.09	0.24	AR1
OSNA	1.32	0.21	0.22	ARMA11
PDEL	2.79	0.64	0.24	WN
PENC	4.01	0.67	0.2	AR1
PFA2	4.51	0.57	0.14	WN
POTS	2.7	0.42	0.18	AR1
PTBB	1.69	0.27	0.25	AR1
REYK	1.47	0.17	0.16	AR1
RIGA	0.7	0.1	0.22	AR1
SFER	3.12	0.59	0.22	WN
SJDV	2.28	0.37	0.22	AR1
SKE0	2.5	0.3	0.17	AR1
SMID	3	0.43	0.27	AR1
SMNE	2.23	0.38	0.23	WN
SODA	3.14	0.32	0.14	WN
SOFI	3.73	0.49	0.16	AR1
SONS	2.35	0.33	0.26	AR1
STAS	1.93	0.27	0.27	AR1
SULD	2.94	0.41	0.26	AR1
TERS	0.82	0.13	0.2	AR1
TLSE	1.89	0.36	0.24	WN
TORI	4.49	0.88	0.2	WN
TRDS	-0.51	-0.06	0.23	AR1
TRO1	0.93	0.1	0.17	WN
TUBI	6.38	1.14	0.53	PL
TUOR	2.39	0.31	0.23	AR1
UNPG	4.93	0.91	0.26	AR1
VAAS	3.35	0.42	0.18	AR1
VALE	5.62	1.22	0.29	AR1
VARS	3.39	0.33	0.18	WN
VIL0	1.25	0.13	0.15	AR1
VILL	1.23	0.19	0.21	AR1
VIS0	1.26	0.17	0.19	AR1
WARE	2.49	0.4	0.17	ARMA11
WSRA	0.88	0.14	0.21	AR1
WSRT	0.69	0.11	0.22	AR1
WTZA	2.72	0.38	0.15	WN
WTZR	3.31	0.46	0.14	ARMA11
WTZZ	3.22	0.45	0.17	ARMA11
YEBE	5.27	0.7	0.23	AR1
ZECK	3.29	0.45	0.38	PL
ZIMM	3.09	0.41	0.12	WN

## Sheet: JRA55
Station	Relative trend (% decade-1)	Trend (kg m-2 decade-1)	Standard deviation of trend (kg m-2 decade-1)	Optimal noise model
ABER	0.75	0.11	0.21	AR1
ACOR	1.99	0.38	0.25	AR1
ALAC	6.14	1.23	0.22	AR1
ALME	4.8	0.92	0.27	AR1
APEL	1.67	0.26	0.24	ARMA11
AQUI	3.01	0.44	0.24	AR1
BELL	5.58	0.75	0.19	AR1
BOGO	3.45	0.52	0.18	WN
BOR1	3.38	0.52	0.15	WN
BRAS	4	0.52	0.18	WN
BRST	1.8	0.31	0.27	AR1
BSHM	3.93	0.65	0.39	PL
BUCU	4.11	0.74	0.23	AR1
BUDP	3.07	0.43	0.28	AR1
BZRG	3.59	0.63	0.19	WN
CASC	2.39	0.44	0.33	AR1
CREU	5.95	1.11	0.37	AR1
DARE	1.33	0.21	0.28	AR1
DELF	1.63	0.26	0.17	ARMA11
DENT	2.38	0.39	0.18	ARMA11
DOUR	2.74	0.41	0.16	ARMA11
EBRE	5.55	1.08	0.23	AR1
EDIN	0.27	0.04	0.25	AR1
EIJS	2.03	0.33	0.18	ARMA11
ERLA	2.78	0.43	0.17	ARMA11
EUSK	1.82	0.28	0.19	ARMA11
GAIA	2.93	0.49	0.32	AR1
GENO	3.33	0.62	0.28	AR1
GLAS	0.13	0.02	0.25	AR1
GLSV	1.44	0.21	0.2	AR1
GOPE	3.67	0.5	0.14	ARMA11
GRAS	4.38	0.46	0.13	AR1
GRAZ	2.74	0.42	0.13	WN
GSR1	4.28	0.75	0.24	WN
HELG	2.03	0.31	0.25	AR1
HERS	2.26	0.37	0.28	AR1
HOBU	2.34	0.35	0.24	AR1
HOFN	0.69	0.08	0.19	AR1
INVR	-0.54	-0.08	0.2	ARMA11
ISTA	6.03	1.08	0.57	PL
JOEN	2.83	0.33	0.15	WN
JOZE	4.14	0.63	0.15	WN
KARL	3.49	0.58	0.18	ARMA11
KIR0	1.33	0.12	0.12	WN
KLOP	2.47	0.39	0.18	ARMA11
LAMA	2	0.28	0.2	AR1
LAMP	4.49	0.9	0.25	AR1
LEED	0.55	0.08	0.24	AR1
LEIJ	2.77	0.43	0.24	AR1
LLIV	4.84	0.47	0.13	WN
LOV0	0.79	0.1	0.21	AR1
MAD2	3.71	0.5	0.22	AR1
MALA	2.9	0.55	0.3	AR1
MAN2	1.14	0.19	0.19	WN
MAR6	1.03	0.13	0.18	AR1
MARS	3.75	0.7	0.22	WN
MATE	3.67	0.57	0.18	AR1
MEDI	3.81	0.76	0.21	AR1
METS	2.47	0.3	0.16	AR1
MLVL	2.31	0.38	0.25	ARMA11
MODA	3.82	0.45	0.15	WN
MOPI	2.88	0.41	0.19	AR1
NEWL	1.86	0.31	0.25	AR1
NICO	3.88	0.66	0.44	PL
ONSA	3.04	0.42	0.17	AR1
ORID	5.08	0.75	0.23	AR1
OSLS	1.29	0.16	0.24	AR1
OSNA	1.36	0.21	0.22	ARMA11
PDEL	1.28	0.29	0.24	WN
PENC	4.08	0.66	0.2	AR1
PFA2	4.55	0.53	0.15	AR1
POTS	3.2	0.49	0.15	WN
PTBB	1.98	0.31	0.25	AR1
REYK	1.59	0.18	0.16	AR1
RIGA	1.1	0.15	0.22	AR1
SFER	4.12	0.77	0.36	PL
SJDV	2.66	0.42	0.18	WN
SKE0	2.03	0.23	0.17	AR1
SMID	3.2	0.45	0.27	AR1
SMNE	2.7	0.45	0.24	WN
SODA	2.67	0.26	0.13	WN
SOFI	5.93	0.7	0.15	AR1
SONS	4.98	0.67	0.26	AR1
STAS	1.39	0.19	0.27	AR1
SULD	3.1	0.42	0.26	AR1
TERS	0.9	0.14	0.2	AR1
TLSE	2.74	0.5	0.24	WN
TORI	4.82	0.84	0.19	WN
TRDS	0.35	0.04	0.23	AR1
TRO1	1.26	0.13	0.16	WN
TUBI	6.97	1.21	0.49	PL
TUOR	1.84	0.23	0.2	WN
UNPG	3.67	0.64	0.24	AR1
VAAS	2.71	0.32	0.15	WN
VALE	6.82	1.37	0.28	AR1
VARS	3.43	0.32	0.17	WN
VIL0	1.21	0.12	0.15	AR1
VILL	2.8	0.41	0.21	AR1
VIS0	0.92	0.12	0.19	AR1
WARE	2.77	0.43	0.17	ARMA11
WSRA	0.9	0.14	0.21	AR1
WSRT	0.71	0.11	0.22	AR1
WTZA	2.81	0.38	0.15	ARMA11
WTZR	3.65	0.49	0.13	ARMA11
WTZZ	3.03	0.41	0.17	ARMA11
YEBE	7.01	0.89	0.23	AR1
ZECK	2.34	0.29	0.25	PL
ZIMM	3.62	0.45	0.11	WN

## Sheet: MERRA2
Station	Relative trend (% decade-1)	Trend (kg m-2 decade-1)	Standard deviation of trend (kg m-2 decade-1)	Optimal noise model
ABER	0.19	0.03	0.31	PL
ACOR	2.44	0.48	0.26	AR1
ALAC	4.12	0.87	0.22	AR1
ALME	3.61	0.72	0.28	AR1
APEL	1.61	0.26	0.28	AR1
AQUI	3.23	0.52	0.26	AR1
BELL	4.7	0.7	0.17	WN
BOGO	4.39	0.69	0.19	WN
BOR1	4.39	0.7	0.15	WN
BRAS	4.26	0.61	0.2	WN
BRST	1.81	0.32	0.25	AR1
BSHM	5.61	0.94	0.25	AR1
BUCU	5.57	1.03	0.28	AR1
BUDP	1.48	0.22	0.28	AR1
BZRG	4.46	0.91	0.23	WN
CASC	1.86	0.35	0.34	AR1
CREU	4.51	0.89	0.31	WN
DARE	0.18	0.03	0.27	AR1
DELF	1.39	0.23	0.2	AR1
DENT	1.64	0.28	0.2	AR1
DOUR	2.53	0.4	0.17	ARMA11
EBRE	3.8	0.79	0.23	AR1
EDIN	-0.64	-0.1	0.25	AR1
EIJS	1.66	0.28	0.18	ARMA11
ERLA	3.26	0.52	0.18	ARMA11
EUSK	1.44	0.23	0.19	ARMA11
GAIA	2.61	0.45	0.34	AR1
GENO	2.97	0.59	0.3	AR1
GLAS	-0.92	-0.15	0.24	AR1
GLSV	3.42	0.53	0.18	WN
GOPE	4.83	0.68	0.14	ARMA11
GRAS	4.72	0.53	0.13	WN
GRAZ	2.61	0.42	0.14	WN
GSR1	5.04	0.93	0.26	WN
HELG	1.27	0.2	0.25	AR1
HERS	0.58	0.1	0.28	AR1
HOBU	2.26	0.35	0.24	AR1
HOFN	1.32	0.16	0.19	AR1
INVR	-1.98	-0.31	0.2	ARMA11
ISTA	4.91	0.93	0.42	ARMA11
JOEN	2.79	0.35	0.15	WN
JOZE	4.73	0.75	0.16	WN
KARL	4.02	0.69	0.22	AR1
KIR0	-0.31	-0.03	0.12	WN
KLOP	2.58	0.42	0.19	ARMA11
LAMA	2.83	0.42	0.21	AR1
LAMP	3.14	0.65	0.27	AR1
LEED	0	0	0.24	AR1
LEIJ	4.02	0.65	0.22	WN
LLIV	4.33	0.5	0.15	WN
LOV0	0.36	0.05	0.21	AR1
MAD2	2.57	0.36	0.23	AR1
MALA	1.21	0.24	0.26	WN
MAN2	1.32	0.23	0.2	WN
MAR6	0.81	0.11	0.19	AR1
MARS	4.72	0.91	0.23	WN
MATE	3.46	0.58	0.2	AR1
MEDI	3.88	0.8	0.23	AR1
METS	2.09	0.27	0.16	AR1
MLVL	2.72	0.47	0.26	ARMA11
MODA	5.18	0.68	0.17	WN
MOPI	3.46	0.51	0.2	AR1
NEWL	1.04	0.18	0.24	AR1
NICO	4.04	0.74	0.41	PL
ONSA	2.39	0.35	0.18	AR1
ORID	5.59	0.9	0.27	AR1
OSLS	0.45	0.06	0.25	AR1
OSNA	1.32	0.21	0.23	ARMA11
PDEL	0.38	0.09	0.24	WN
PENC	4.84	0.81	0.21	AR1
PFA2	5.55	0.7	0.16	AR1
POTS	3.69	0.58	0.18	AR1
PTBB	2.42	0.39	0.26	AR1
REYK	1.35	0.16	0.16	AR1
RIGA	1.17	0.17	0.23	AR1
SFER	2.45	0.47	0.23	WN
SJDV	4.92	0.82	0.23	AR1
SKE0	0.16	0.02	0.17	AR1
SMID	1.97	0.29	0.27	AR1
SMNE	2.97	0.52	0.24	WN
SODA	1.42	0.15	0.14	WN
SOFI	5.59	0.73	0.18	AR1
SONS	2.85	0.4	0.28	AR1
STAS	0.7	0.1	0.27	AR1
SULD	1.75	0.25	0.27	AR1
TERS	0.68	0.11	0.2	AR1
TLSE	3.31	0.64	0.25	WN
TORI	5.79	1.1	0.22	WN
TRDS	-0.41	-0.05	0.24	AR1
TRO1	0.18	0.02	0.17	WN
TUBI	6.69	1.25	0.55	PL
TUOR	1.81	0.24	0.2	WN
UNPG	3.15	0.58	0.26	AR1
VAAS	1.65	0.21	0.18	AR1
VALE	3.53	0.75	0.27	AR1
VARS	2.49	0.25	0.17	WN
VIL0	-0.18	-0.02	0.16	AR1
VILL	1.65	0.25	0.21	AR1
VIS0	0.51	0.07	0.19	AR1
WARE	2.35	0.38	0.17	ARMA11
WSRA	0.74	0.12	0.22	AR1
WSRT	0.56	0.09	0.22	AR1
WTZA	3.84	0.54	0.15	WN
WTZR	4.51	0.63	0.13	WN
WTZZ	4.12	0.58	0.17	WN
YEBE	4.87	0.65	0.24	AR1
ZECK	3.77	0.52	0.32	PL
ZIMM	4.51	0.61	0.12	WN

## Sheet: NCEP2
Station	Relative trend (% decade-1)	Trend (kg m-2 decade-1)	Standard deviation of trend (kg m-2 decade-1)	Optimal noise model
ABER	1.11	0.17	0.38	PL
ACOR	2.11	0.43	0.25	AR1
ALAC	7.97	1.76	0.24	AR1
ALME	8.31	1.8	0.28	AR1
APEL	3.52	0.57	0.23	ARMA11
AQUI	5.88	0.86	0.24	AR1
BELL	8.74	1.21	0.19	AR1
BOGO	4.67	0.74	0.19	WN
BOR1	4.89	0.76	0.24	PL
BRAS	6.25	0.86	0.19	WN
BRST	2.87	0.51	0.28	AR1
BSHM	2.73	0.5	0.49	PL
BUCU	4.89	0.92	0.26	AR1
BUDP	4.93	0.72	0.44	PL
BZRG	5.78	1.08	0.24	AR1
CASC	4.16	0.82	0.33	AR1
CREU	7.37	1.48	0.37	AR1
DARE	2.26	0.36	0.27	AR1
DELF	3.15	0.52	0.17	ARMA11
DENT	4.22	0.71	0.17	ARMA11
DOUR	5.14	0.79	0.17	ARMA11
EBRE	8.09	1.69	0.24	AR1
EDIN	0.33	0.05	0.25	AR1
EIJS	3.98	0.66	0.18	ARMA11
ERLA	4.21	0.68	0.18	ARMA11
EUSK	3.78	0.59	0.19	ARMA11
GAIA	4.05	0.73	0.3	AR1
GENO	5.37	1.09	0.29	AR1
GLAS	0.13	0.02	0.25	AR1
GLSV	2.83	0.43	0.22	AR1
GOPE	4.43	0.6	0.14	ARMA11
GRAS	6.15	0.64	0.13	AR1
GRAZ	4.15	0.64	0.14	WN
GSR1	6.66	1.2	0.24	WN
HELG	2.23	0.35	0.24	AR1
HERS	3.49	0.59	0.25	ARMA11
HOBU	3.58	0.54	0.33	PL
HOFN	1.22	0.15	0.19	AR1
INVR	-0.84	-0.13	0.27	AR1
ISTA	6.7	1.26	0.61	PL
JOEN	3.27	0.4	0.16	WN
JOZE	5.51	0.88	0.16	WN
KARL	5.1	0.9	0.19	ARMA11
KIR0	3.79	0.34	0.12	WN
KLOP	3.49	0.55	0.18	ARMA11
LAMA	4.06	0.59	0.2	AR1
LAMP	5.1	1.07	0.24	AR1
LEED	1.77	0.26	0.23	AR1
LEIJ	4.2	0.66	0.34	PL
LLIV	9.04	0.88	0.15	AR1
LOV0	2.45	0.32	0.21	AR1
MAD2	4.98	0.71	0.5	PL
MALA	8.44	1.79	0.3	AR1
MAN2	3.53	0.61	0.3	PL
MAR6	3.29	0.43	0.19	AR1
MARS	5.54	1.14	0.22	WN
MATE	6.66	1.05	0.18	AR1
MEDI	7.11	1.51	0.24	AR1
METS	3.92	0.48	0.16	AR1
MLVL	5.25	0.92	0.25	ARMA11
MODA	4.65	0.54	0.15	WN
MOPI	4.18	0.6	0.2	AR1
NEWL	2.76	0.47	0.26	AR1
NICO	1.77	0.34	0.54	PL
ONSA	4.92	0.71	0.17	AR1
ORID	6.87	1.02	0.25	AR1
OSLS	3.32	0.44	0.26	AR1
OSNA	3.04	0.48	0.22	ARMA11
PDEL	2.71	0.65	0.22	WN
PENC	4.67	0.77	0.2	AR1
PFA2	6.25	0.74	0.13	WN
POTS	4.21	0.65	0.24	PL
PTBB	3.35	0.53	0.25	AR1
REYK	3.3	0.39	0.17	AR1
RIGA	1.75	0.25	0.22	AR1
SFER	7.17	1.49	0.41	PL
SJDV	5.4	0.9	0.22	AR1
SKE0	5.56	0.66	0.18	AR1
SMID	3.29	0.48	0.26	AR1
SMNE	5.02	0.88	0.24	WN
SODA	3.9	0.39	0.14	WN
SOFI	4.79	0.58	0.16	AR1
SONS	8.49	1.23	0.29	AR1
STAS	2.27	0.32	0.27	AR1
SULD	3.57	0.51	0.26	AR1
TERS	1.58	0.25	0.2	AR1
TLSE	6.65	1.28	0.25	WN
TORI	6.59	1.25	0.21	WN
TRDS	2.47	0.29	0.24	AR1
TRO1	3.35	0.36	0.17	WN
TUBI	7.74	1.41	0.53	PL
TUOR	2.87	0.36	0.19	WN
UNPG	6.56	1.2	0.24	AR1
VAAS	5.66	0.68	0.18	AR1
VALE	9.11	2	0.32	AR1
VARS	3.8	0.36	0.17	WN
VIL0	5.55	0.57	0.16	AR1
VILL	5.45	0.85	0.24	AR1
VIS0	2.26	0.3	0.19	AR1
WARE	4.91	0.78	0.17	ARMA11
WSRA	1.65	0.26	0.21	AR1
WSRT	1.53	0.24	0.21	AR1
WTZA	4.16	0.57	0.14	WN
WTZR	4.92	0.67	0.14	ARMA11
WTZZ	4.59	0.63	0.17	ARMA11
YEBE	10.02	1.34	0.25	AR1
ZECK	2.42	0.31	0.39	PL
ZIMM	5.24	0.67	0.11	WN
